# Supplementary material for: First Qualification Study of Serum Biomarkers as Indicators of Total Body Burden of Osteoarthritis
Source: PubMed Central journal article supplement (PMC2840035; doi:10.1371/journal.pone.0009739), 2010-03-17

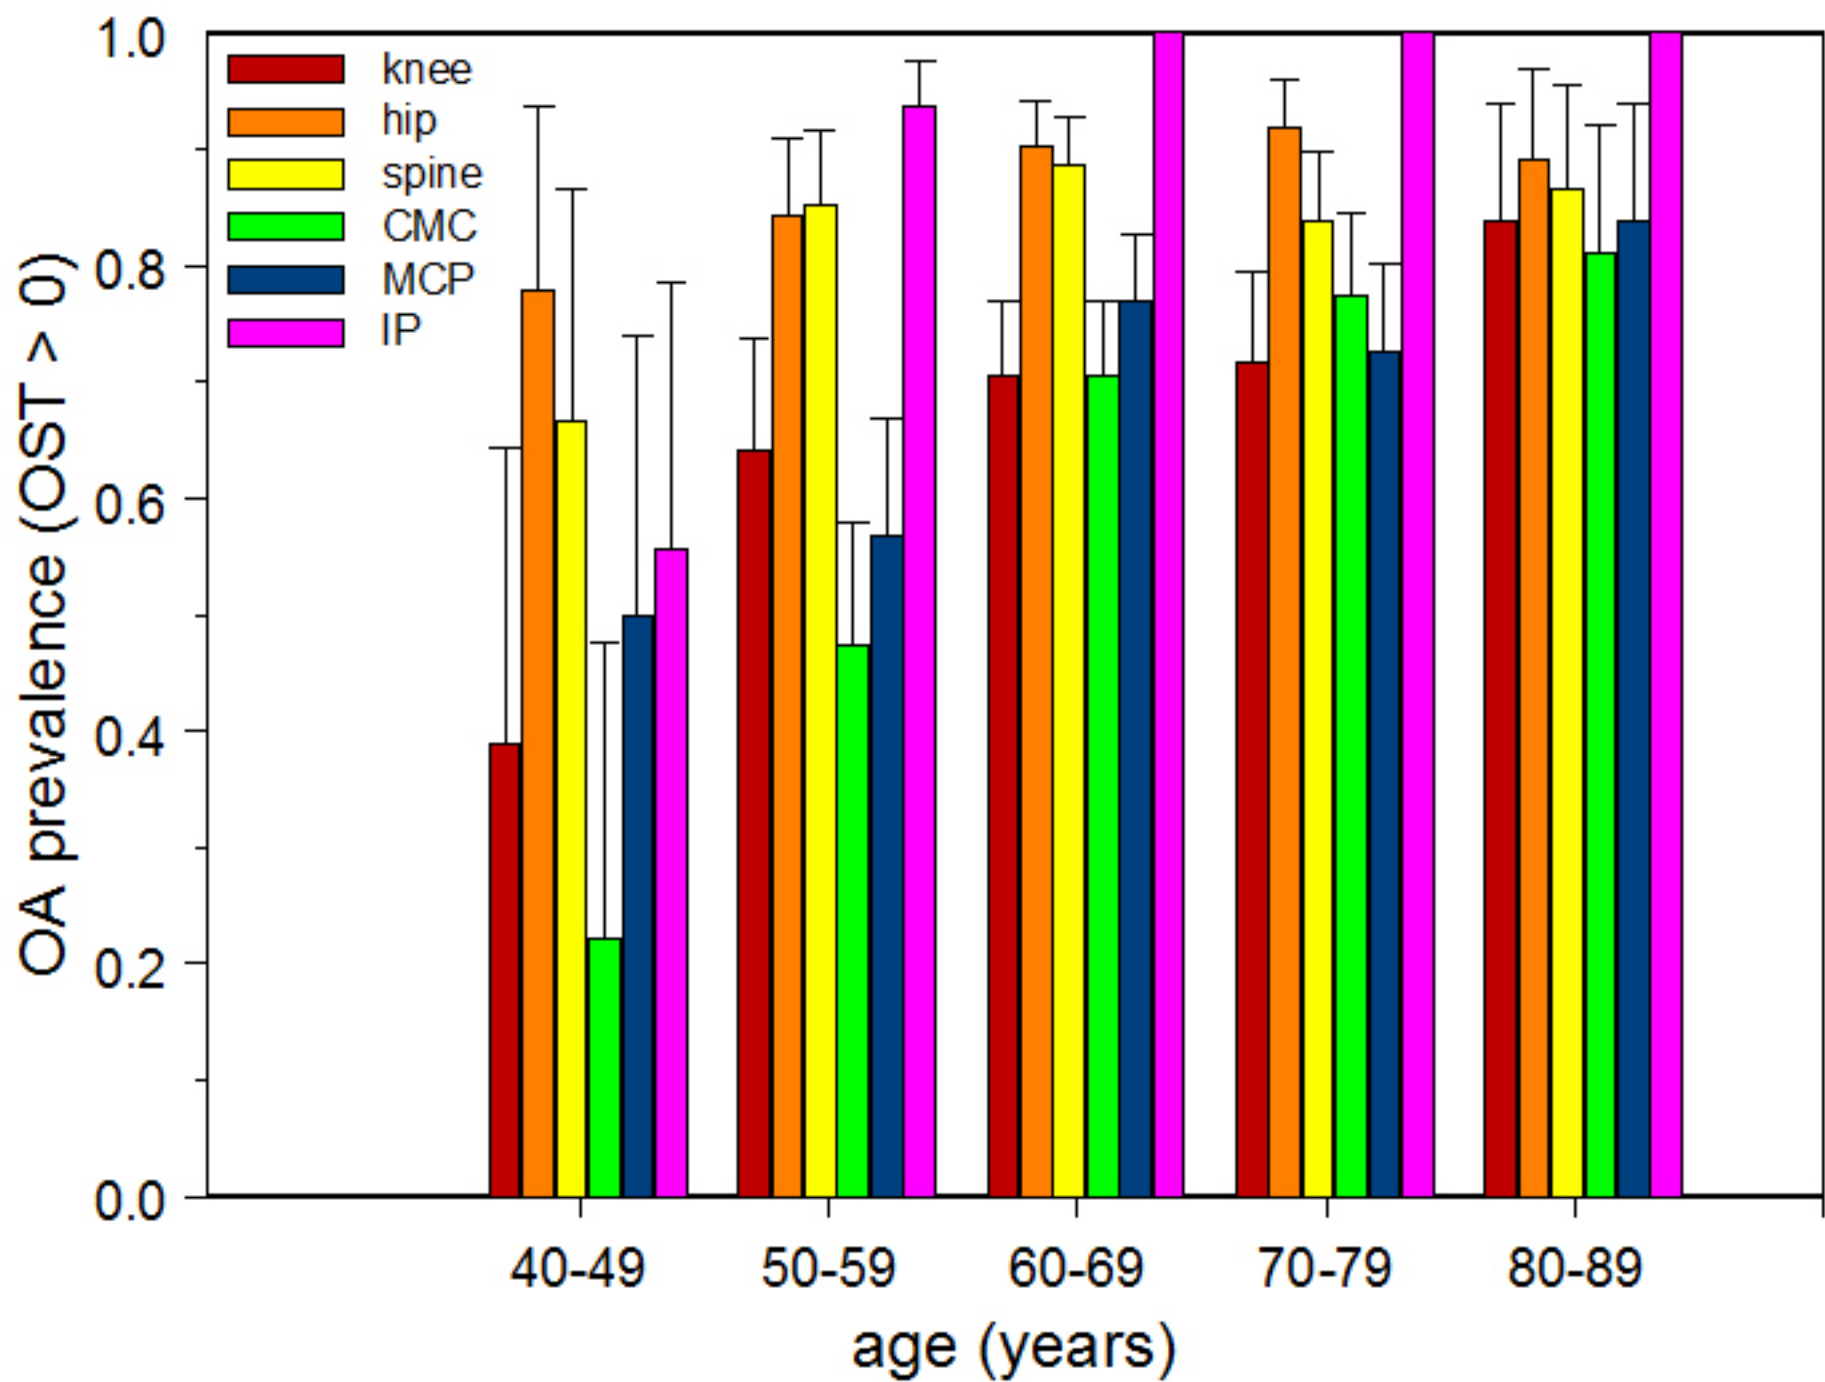

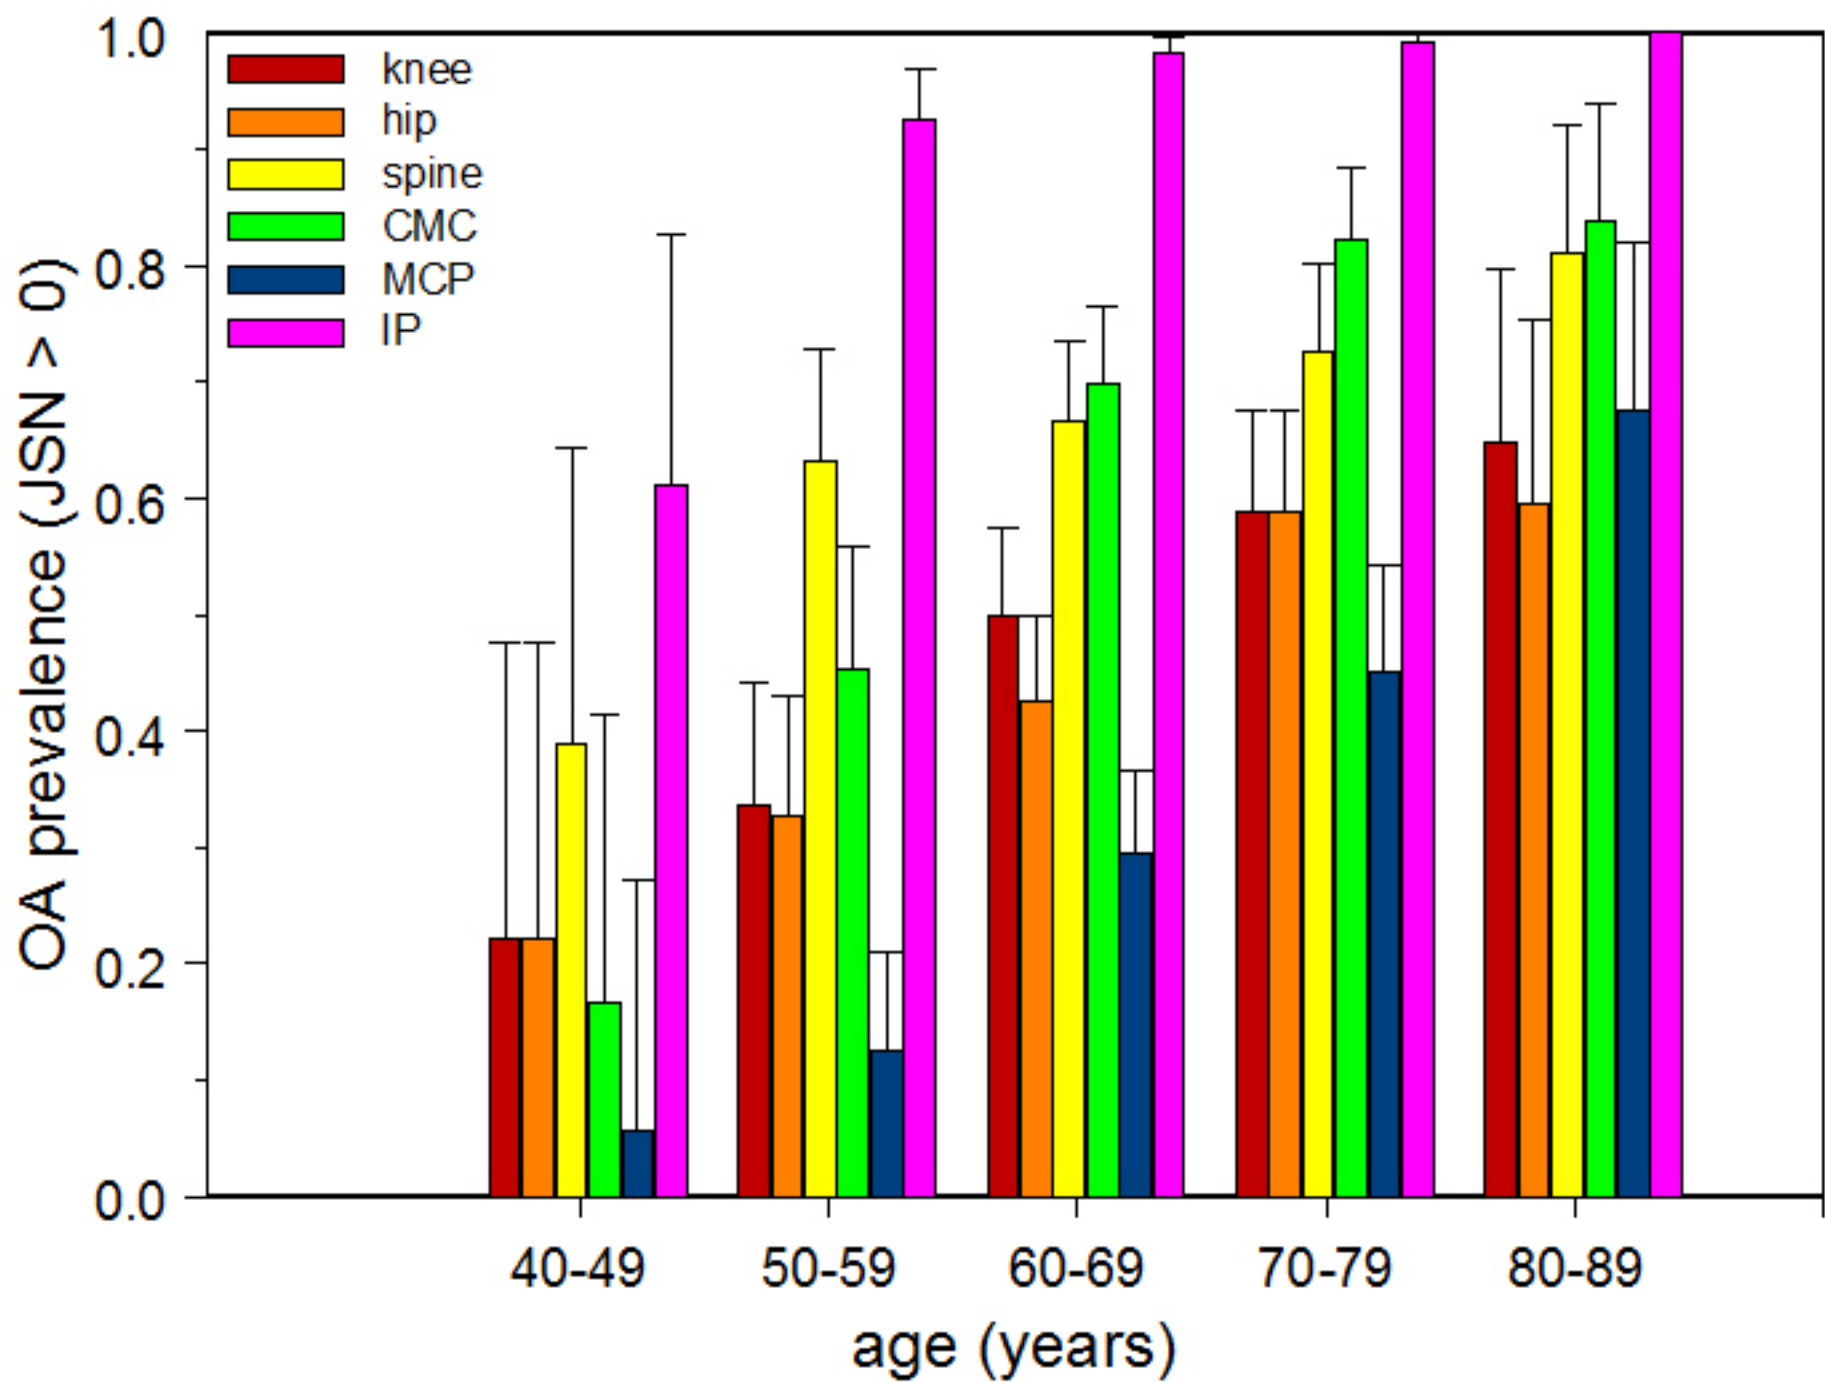

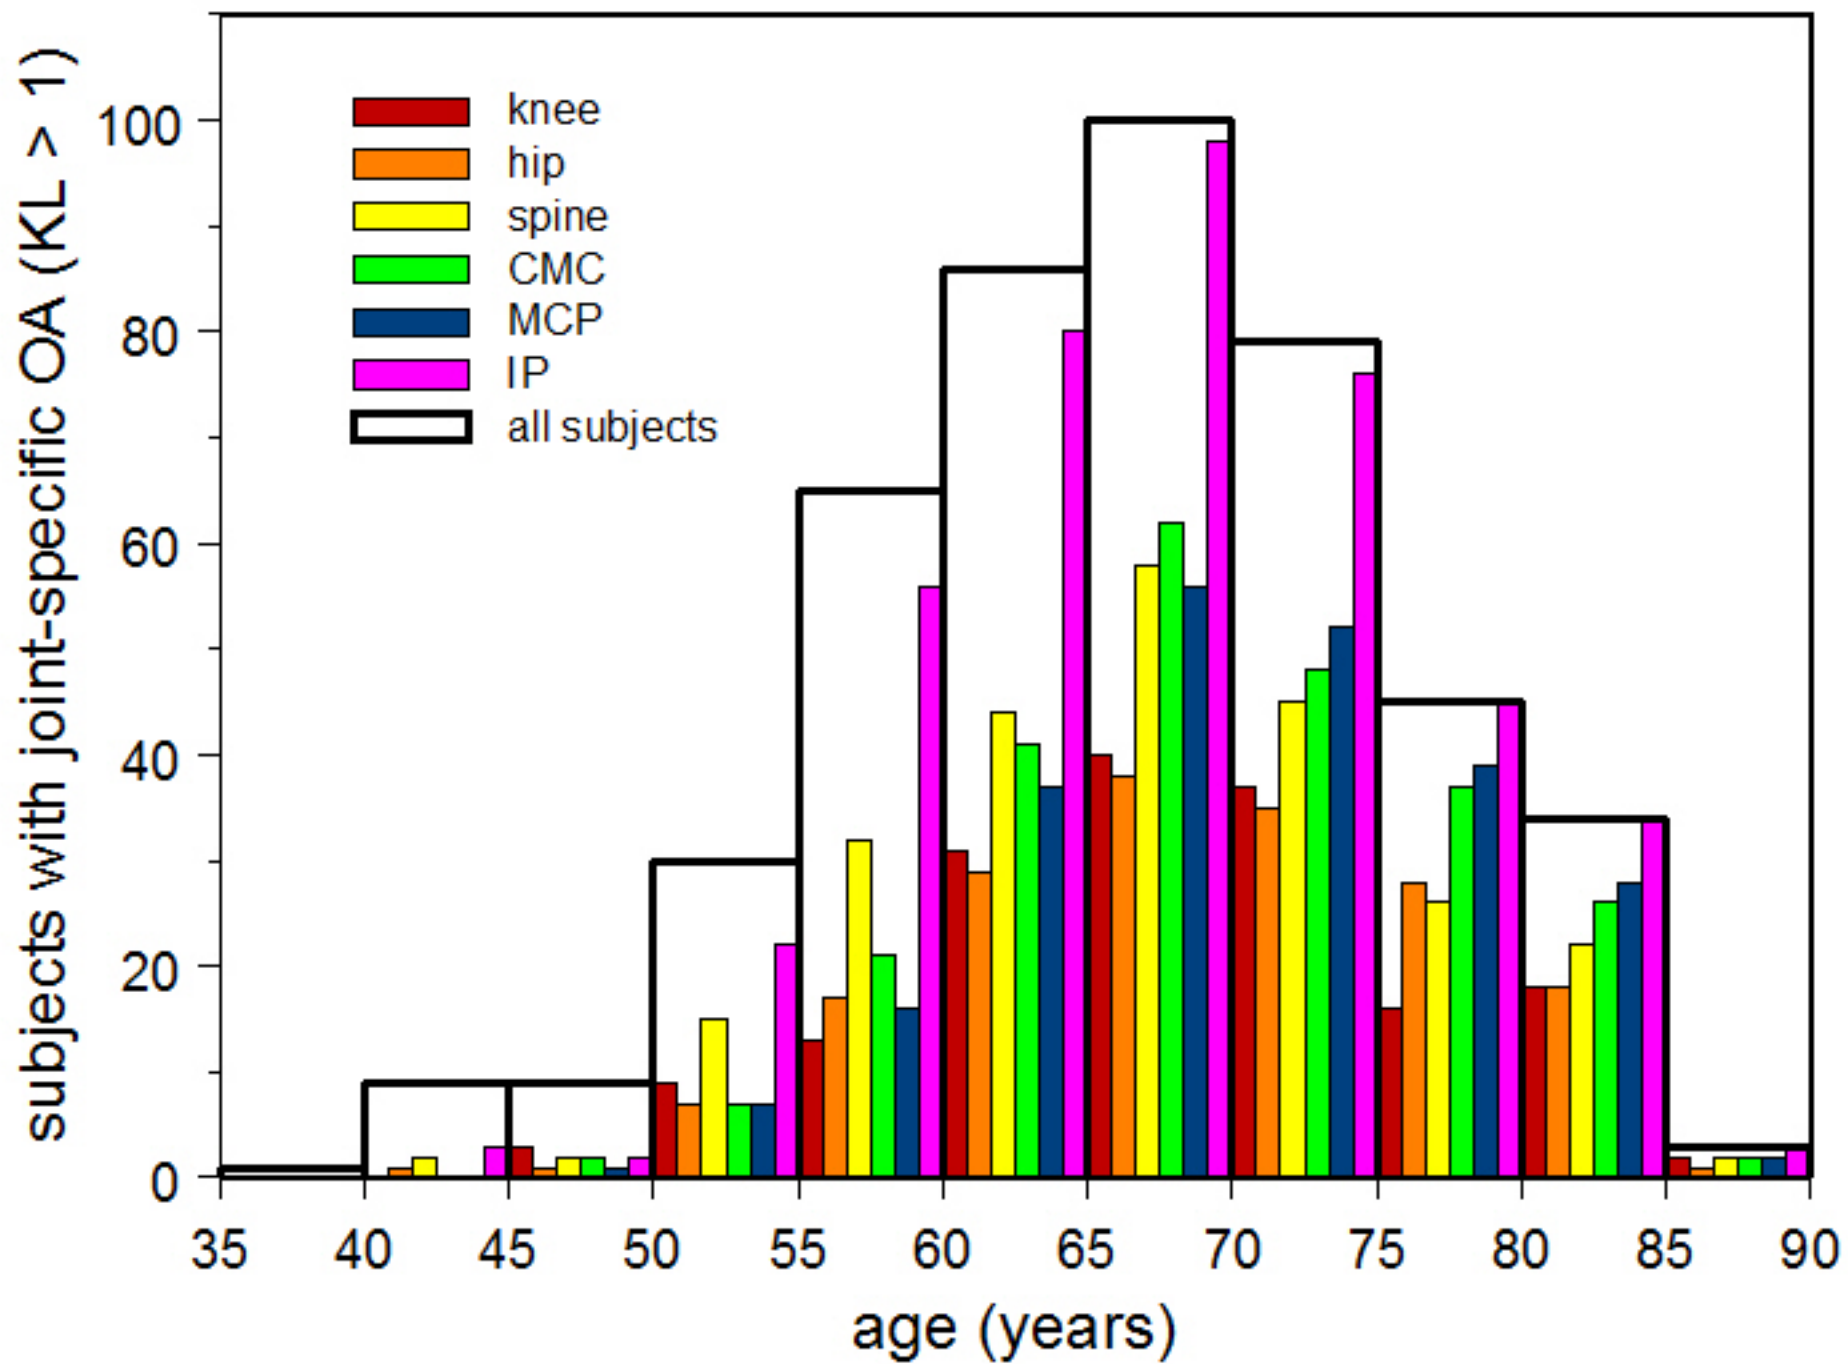

Supplement: pone.0009739.s004.pdf [file pone.0009739.s004.pdf]
